# Supplementary material
Source: PubMed Central journal article supplement (PMC2758418)

**Supp. Table S1. Full results for all directly genotyped markers in ABCA1 in dementia cases vs. control**

| Marker     | Assoc Allele | Case,Control Counts  | Case,Control Freq. | Chi square | P value  | SNP type | Strand |
|------------|--------------|----------------------|--------------------|------------|----------|----------|--------|
| rs363717   | A            | 2533:539, 3513:847   | 0.825, 0.806       | 4.20       | 4.03E-02 | [A/G]    | (-)    |
| rs4149338  | A            | 943:2121, 1299:3055  | 0.308, 0.298       | 0.76       | 3.84E-01 | [A/G]    | (+)    |
| rs2482433  | G            | 900:2134, 1252:3082  | 0.297, 0.289       | 0.52       | 4.71E-01 | [A/G]    | (+)    |
| rs2740485  | A            | 2823:253, 3962:398   | 0.918, 0.909       | 1.84       | 1.75E-01 | [A/C]    | (-)    |
| rs2066881  | A            | 2901:177, 4088:270   | 0.942, 0.938       | 0.63       | 4.27E-01 | [A/G]    | (-)    |
| rs4149336  | A            | 2566:510, 3614:742   | 0.834, 0.830       | 0.27       | 6.07E-01 | [A/G]    | (+)    |
| rs2297406  | G            | 2075:933, 2974:1340  | 0.690, 0.689       | 0.00       | 9.68E-01 | [A/G]    | (-)    |
| rs2020927  | G            | 363:2713, 509:3851   | 0.118, 0.117       | 0.03       | 8.67E-01 | [A/G]    | (+)    |
| rs2230808  | G            | 2408:660, 3398:960   | 0.785, 0.780       | 0.28       | 5.96E-01 | [A/G]    | (-)    |
| rs2297404  | G            | 2849:227, 4013:345   | 0.926, 0.921       | 0.73       | 3.92E-01 | [C/G]    | (-)    |
| rs2777801  | A            | 2770:290, 3907:437   | 0.905, 0.899       | 0.69       | 4.07E-01 | [A/C]    | (+)    |
| rs2066716  | G            | 2850:190, 3999:347   | 0.938, 0.920       | 7.98       | 4.70E-03 | [A/G]    | (-)    |
| rs2297409  | G            | 2524:538, 3553:793   | 0.824, 0.818       | 0.56       | 4.55E-01 | [A/G]    | (+)    |
| rs33918808 | C            | 2995:75, 4226:126    | 0.976, 0.971       | 1.40       | 2.37E-01 | [C/G]    | (+)    |
| rs4149313  | G            | 312:2756, 443:3917   | 0.102, 0.102       | 0.00       | 9.90E-01 | [A/G]    | (-)    |
| rs2066717  | A            | 156:2908, 217:4133   | 0.051, 0.050       | 0.04       | 8.42E-01 | [A/G]    | (+)    |
| rs2065412  | G            | 1469:1519, 1952:2372 | 0.492, 0.451       | 11.47      | 7.00E-04 | [A/G]    | (-)    |
| rs2515601  | A            | 2768:274, 3875:465   | 0.910, 0.893       | 5.79       | 1.62E-02 | [A/G]    | (+)    |
| rs2472386  | G            | 2157:889, 2966:1384  | 0.708, 0.682       | 5.82       | 1.58E-02 | [A/G]    | (+)    |
| rs2274873  | G            | 2725:265, 3834:410   | 0.911, 0.903       | 1.32       | 2.51E-01 | [A/G]    | (+)    |
| rs4149291  | C            | 2745:331, 3801:545   | 0.892, 0.875       | 5.48       | 1.92E-02 | [C/G]    | (+)    |
| rs1175293  | A            | 2884:184, 4083:265   | 0.940, 0.939       | 0.03       | 8.63E-01 | [A/G]    | (-)    |
| rs2230806  | G            | 2363:645, 3200:1096  | 0.786, 0.745       | 16.14      | 5.89E-05 | [A/G]    | (-)    |
| rs2230805  | G            | 2320:498, 3161:945   | 0.823, 0.770       | 28.92      | 7.55E-08 | [A/G]    | (-)    |
| rs4149271  | G            | 2465:601, 3451:903   | 0.804, 0.793       | 1.44       | 2.30E-01 | [A/G]    | (+)    |
| rs11789603 | G            | 2794:284, 3894:464   | 0.908, 0.894       | 4.02       | 4.49E-02 | [A/G]    | (-)    |
| rs4149268  | G            | 1963:1103, 2768:1588 | 0.640, 0.635       | 0.18       | 6.72E-01 | [A/G]    | (-)    |
| rs3890182  | A            | 404:2670, 553:3805   | 0.131, 0.127       | 0.33       | 5.66E-01 | [A/G]    | (+)    |
| rs10120087 | C            | 2769:301, 3891:465   | 0.902, 0.893       | 1.48       | 2.25E-01 | [A/C]    | (+)    |
| rs2740487  | A            | 1443:1617, 2024:2336 | 0.472, 0.464       | 0.39       | 5.32E-01 | [A/G]    | (+)    |
| rs2777793  | A            | 1380:1690, 1950:2398 | 0.450, 0.448       | 0.01       | 9.30E-01 | [A/G]    | (-)    |
| rs3905001  | G            | 2185:757, 3041:1149  | 0.743, 0.726       | 2.53       | 1.12E-01 | [C/G]    | (+)    |
| rs2575879  | C            | 1426:1638, 1956:2388 | 0.465, 0.450       | 1.66       | 1.98E-01 | [C/G]    | (+)    |
| rs10820743 | G            | 865:2193, 1177:3159  | 0.283, 0.271       | 1.17       | 2.80E-01 | [A/G]    | (-)    |
| rs4149264  | C            | 663:2401, 840:3518   | 0.216, 0.193       | 6.22       | 1.26E-02 | [C/G]    | (+)    |
| rs4149262  | T            | 268:2788, 373:3961   | 0.088, 0.086       | 0.06       | 8.06E-01 | [A/T]    | (+)    |
| rs12350560 | G            | 2824:246, 3907:433   | 0.920, 0.900       | 8.33       | 3.90E-03 | [A/G]    | (+)    |
| rs2437811  | A            | 2481:589, 3512:846   | 0.808, 0.806       | 0.06       | 8.07E-01 | [A/G]    | (-)    |
| rs10991414 | G            | 456:2536, 646:3614   | 0.152, 0.152       | 0.01       | 9.29E-01 | [A/G]    | (-)    |
| rs2472377  | G            | 1594:1366, 2269:2019 | 0.539, 0.529       | 0.62       | 4.32E-01 | [A/G]    | (-)    |
| rs1800977  | G            | 1955:1075, 2769:1561 | 0.645, 0.639       | 0.25       | 6.14E-01 | [A/G]    | (+)    |
| rs2246293  | G            | 1399:1557, 2007:2255 | 0.473, 0.471       | 0.04       | 8.43E-01 | [C/G]    | (+)    |
| rs2043664  | G            | 2203:871, 3113:1245  | 0.717, 0.714       | 0.05       | 8.26E-01 | [A/G]    | (+)    |
| rs2487042  | G            | 2351:667, 3351:981   | 0.779, 0.774       | 0.30       | 5.82E-01 | [A/G]    | (-)    |
| rs2472496  | G            | 1333:1711, 1882:2450 | 0.438, 0.434       | 0.09       | 7.67E-01 | [A/G]    | (+)    |

| Marker    | Assoc Allele | Case,Control Counts | Case,Control Freq. | Chi square | P value  | SNP type | Strand |
|-----------|--------------|---------------------|--------------------|------------|----------|----------|--------|
| rs3887137 | A            | 362:2656, 498:3708  | 0.120, 0.118       | 0.04       | 8.42E-01 | [A/G]    | (-)    |

All results are based upon simple allele counts in 2x2 chi-square contingency tables. The threshold for significance considering 46 tests and strict Bonferroni correction is  $P = 1.1E-03$ . For each associated allele and SNP type, strand is shown relative to the reference sequence of the human genome.

### Supp. Table S2. Haplotype frequencies in cases and controls for directly typed variants in ABCA1

| Haplotype               | Case,Control Ratio Counts | Case,Control Freq. | Chi Square | P Value  |
|-------------------------|---------------------------|--------------------|------------|----------|
| Block 3 (markers 8-12)  |                           |                    |            |          |
| AGGAG                   | 2206:869,3030:1319        | 0.717, 0.697       | 3.675      | 5.52E-02 |
| AAGCG                   | 269:2806,412:3937         | 0.088, 0.095       | 1.083      | 2.98E-01 |
| GACAG                   | 227:2848,342:4007         | 0.074, 0.079       | 0.575      | 4.48E-01 |
| AGGAA                   | 193:2882,347:4003         | 0.063, 0.080       | 7.697      | 5.50E-03 |
| GAGAG                   | 119:2956,149:4200         | 0.039, 0.034       | 1.009      | 3.15E-01 |
| AAGAG                   | 33:3042,40:4309           | 0.011, 0.009       | 0.504      | 4.78E-01 |
| Block 5 (markers 15-20) |                           |                    |            |          |
| AGGAGG                  | 1506:1563,1958:2387       | 0.491, 0.451       | 11.706     | 6.00E-04 |
| AGAAGG                  | 662:2407,1004:3341        | 0.216, 0.231       | 2.367      | 1.24E-01 |
| AGAGAG                  | 280:2790,467:3878         | 0.091, 0.108       | 5.344      | 2.08E-02 |
| AGAAAA                  | 288:2781,450:3896         | 0.094, 0.104       | 1.833      | 1.76E-01 |
| GGAAAG                  | 154:2915,225:4121         | 0.050, 0.052       | 0.095      | 7.58E-01 |
| GAAAAG                  | 158:2911,212:4134         | 0.052, 0.049       | 0.303      | 5.82E-01 |
| Block 6 (markers 21-24) |                           |                    |            |          |
| CAGG                    | 2178:897,2897:1458        | 0.708, 0.665       | 15.462     | 8.42E-05 |
| CAAA                    | 325:2750,557:3798         | 0.106, 0.128       | 8.443      | 3.70E-03 |
| GAAA                    | 260:2815,449:3906         | 0.085, 0.103       | 7.208      | 7.30E-03 |
| CGGG                    | 183:2892,265:4090         | 0.060, 0.061       | 0.054      | 8.16E-01 |
| GAAG                    | 51:3024,81:4274           | 0.017, 0.019       | 0.335      | 5.63E-01 |
| Block 8 (markers 31-33) |                           |                    |            |          |
| GCA                     | 1384:1693,1888:2471       | 0.450, 0.433       | 2.031      | 1.54E-01 |
| AGG                     | 773:2304,1062:3297        | 0.251, 0.244       | 0.567      | 4.52E-01 |
| AGA                     | 565:2512,822:3537         | 0.184, 0.189       | 0.294      | 5.88E-01 |
| GGA                     | 207:2870,387:3972         | 0.067, 0.089       | 11.328     | 8.00E-04 |
| GGG                     | 98:2979,121:4238          | 0.032, 0.028       | 1.038      | 3.08E-01 |
| ACA                     | 45:3032,71:4288           | 0.015, 0.016       | 0.316      | 5.74E-01 |
| Block 9 (markers 34-37) |                           |                    |            |          |
| GAGA                    | 1303:1774,1864:2493       | 0.423, 0.428       | 0.147      | 7.02E-01 |
| CAGA                    | 666:2411,840:3517         | 0.217, 0.193       | 6.22       | 1.26E-02 |
| GAGG                    | 591:2487,844:3513         | 0.192, 0.194       | 0.034      | 8.53E-01 |
| GAAA                    | 247:2831,434:3923         | 0.080, 0.100       | 8.266      | 4.00E-03 |
| GTGA                    | 270:2807,373:3984         | 0.088, 0.086       | 0.102      | 7.49E-01 |

Only blocks in which one or more haplotypes were significant at  $p < 0.05$  are shown. The illustration below shows block locations and intervals, defined by LD of solid splines. Eleven blocks were predicted and are shown from left to right as bounded regions. Both rs2230805 and rs2230806 occur in block 6. Shading for LD is according to  $D'$ . Marker numbering for blocks is according to Supp. Table S1. The threshold for significance considering 48 independent haplotype tests is  $P = 1.1E-03$ .

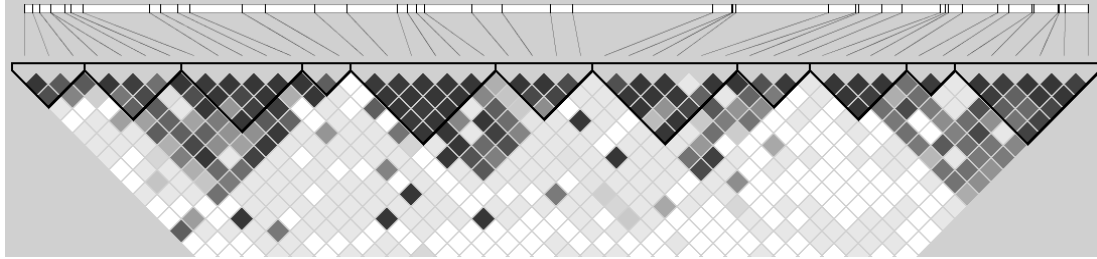

Supplement: NIHMS143316-supplement-Supp_data_01.pdf [file NIHMS143316-supplement-Supp_data_01.pdf]
